# Supplementary material for: Removing Batch Effects from Longitudinal Gene Expression - Quantile Normalization Plus ComBat as Best Approach for Microarray Transcriptome Data
Source: PLOS journal article supplement (doi:10.1371/journal.pone.0156594), 2016-06-07
Supplement: S1 (10.1371/journal.pone.0156594.s001) [file journal.pone.0156594.s001]

**S1 Fig. Batch effects between baseline and 5-year follow up samples.**

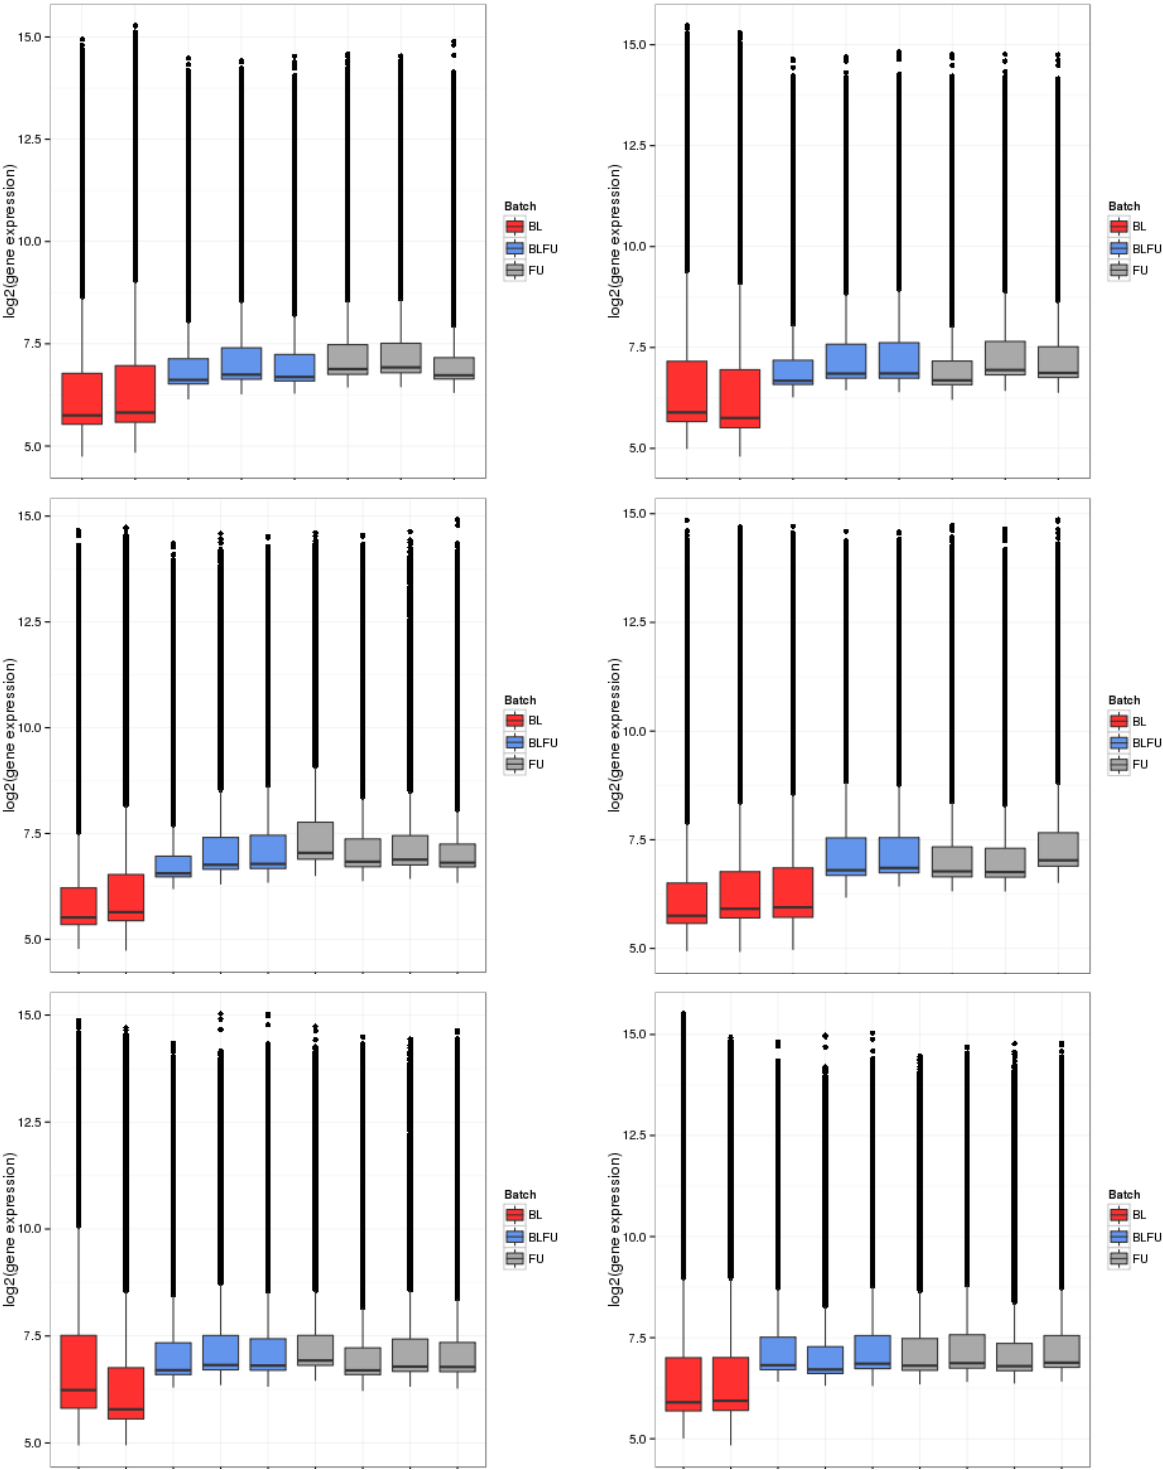

**S1 Fig. Batch effects between baseline and 5-year follow up samples.**

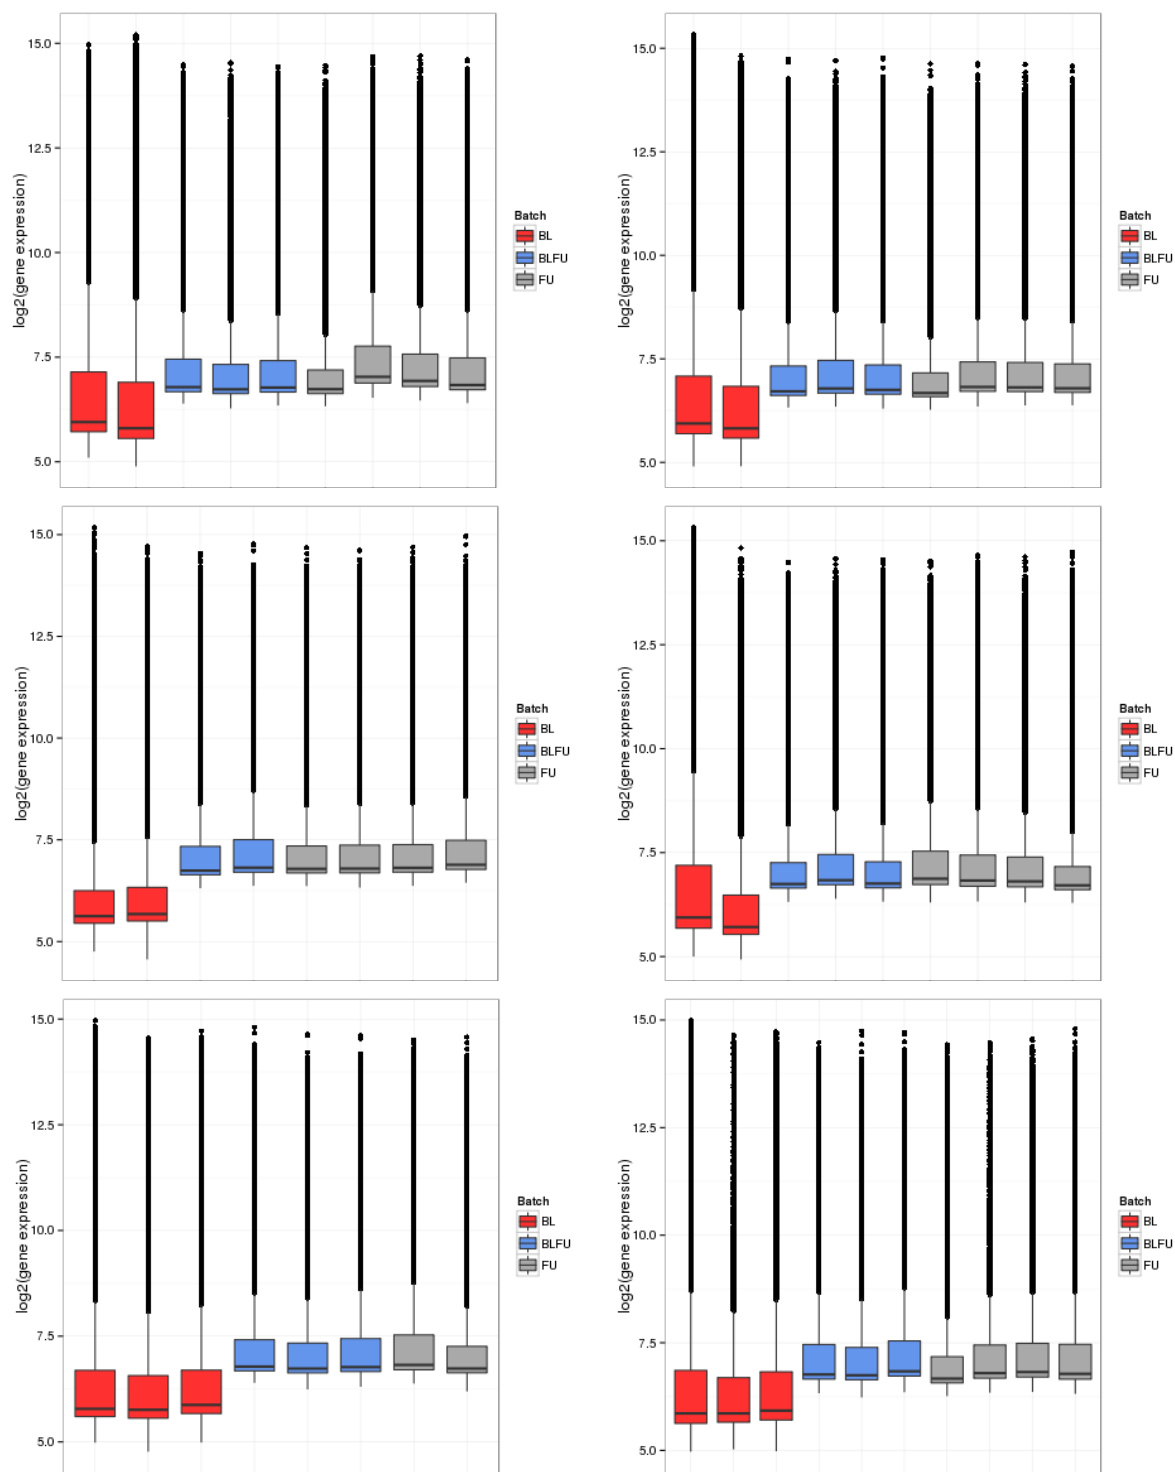

**S1 Fig. Batch effects between baseline and 5-year follow up samples.**

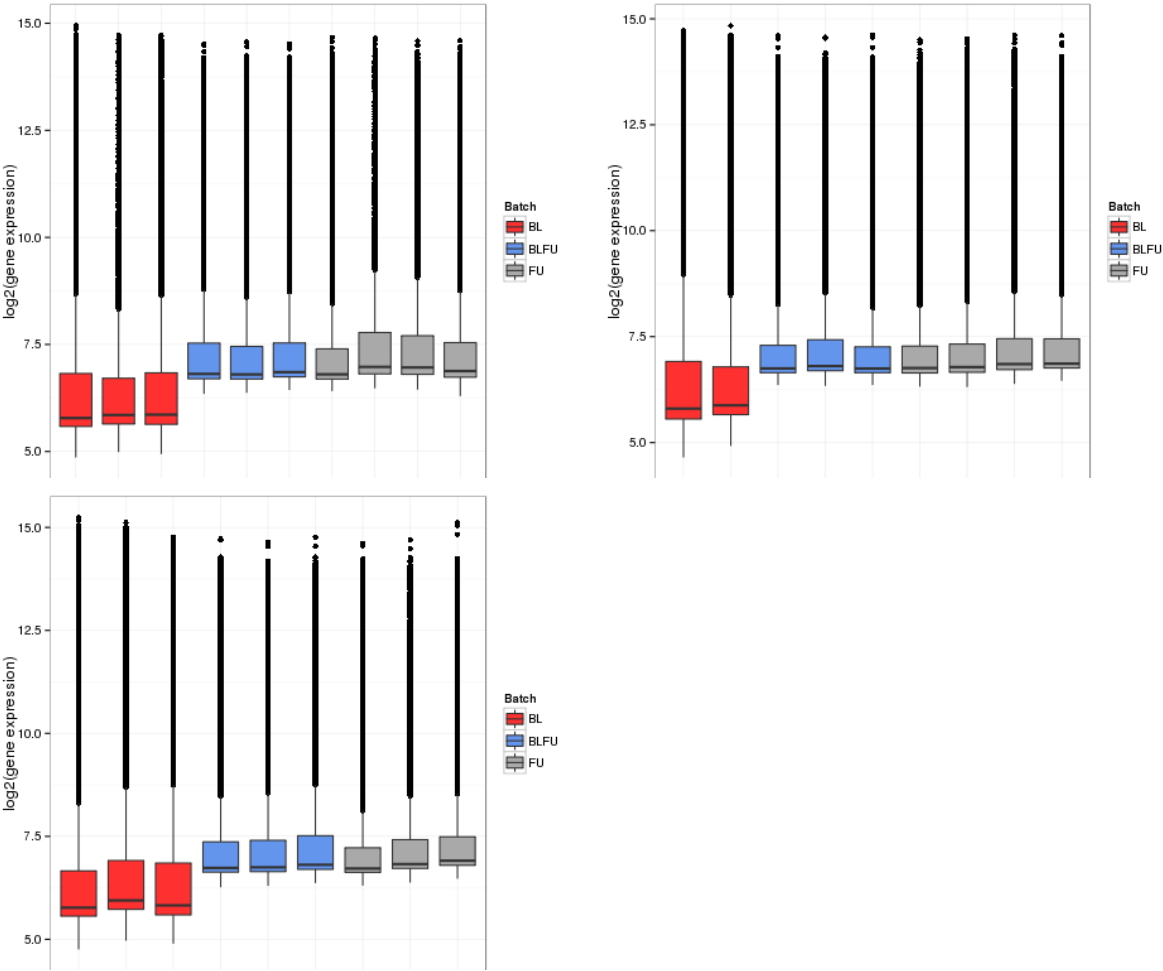

**Batch effects between baseline and 5-year follow up samples.** Boxplots of samples summarized for each of the 15 GHS individuals measured in distinct batches (BL and BLFU) and with RNA extracted and measured 5 years later. Distributions clearly indicate that batch effects outweigh biological effects.
